# Supplementary material for: Improved Visible-Light Photocatalytic H2 Evolution of G-C3N4 Nanosheets by Constructing Heterojunctions with Nano-Sized Poly(3-Thiophenecarboxylic Acid) and Coordinating Fe(III)
Source: MDPI journal article supplement (doi:10.3390/nano13081338), 2023-04-12
Supplement: s1 [file s1]

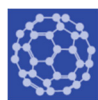

# Improved Visible-Light Photocatalytic H<sub>2</sub> Evolution of G-C<sub>3</sub>N<sub>4</sub> Nanosheets by Constructing Heterojunctions with Nano-Sized Poly(3-Thiophenecarboxylic Acid) and Coordinating Fe(III)

Yong Li <sup>1,2</sup>, Bingmiao Zhang <sup>1</sup>, Xulong Pang <sup>1</sup>, Zhijun Li <sup>1</sup>, Yi Zhang <sup>1</sup>, Ming Hao <sup>1</sup>, Yan Zhu <sup>1</sup>, Chuanli Qin <sup>1,\*</sup> and Liqiang Jing <sup>1</sup>

<sup>1</sup> Key Laboratory of Functional Inorganic Material Chemistry (Ministry of Education), School of Chemistry and Materials Science, Heilongjiang University, Harbin 150080, China

<sup>2</sup> Engineering Research Center for Hemp and Product in Cold Region of Ministry of Education, Qiqihar University, Qiqihar 161006, China

\* Correspondence: qinchuanli@hlju.edu.cn

## 1. Materials characterization and photoactivity evaluation

### 1.1. Materials Characterization

The infrared absorption spectra were investigated using a Fourier-transform infrared (FTIR) spectrophotometer (Equinox 55, Bruker, Karlsruhe, Germany). The morphologies and crystal phases of samples were characterized by transmission electron microscopy (TEM, JEM-2010, JEOL, Tokyo, Japan) and X-ray diffraction patterns (XRD, D8 Advance, Bruker, Karlsruhe, Germany) with a Cu K $\alpha$  radiation source. High-angle annular dark-field scanning transmission electron microscopy (HAADF-STEM, JEM-2010, JEOL, Tokyo, Japan) and energy-dispersive X-ray spectroscopy (EDS, JEM-2010, JEOL, Tokyo, Japan) tests were operated on this TEM equipment. X-ray photoelectron spectroscopy (XPS, Shimadzu, Kyoto, Japan) was employed on a Kratos-Axis Ultra DLD apparatus equipped with an Al (monochromatic) X-ray source to investigate the surface element composition and chemical states, and binding energies were calibrated with respect to the signal for adventitious carbon (binding energy = 284.6 eV). UV-Vis diffuse reflectance spectra (UV-Vis DRS) were performed using a spectrophotometer (UV-2750, Shimadzu, Kyoto, Japan, with BaSO<sub>4</sub> as a reference). The photoluminescence (PL) spectra of samples were recorded using a spectrophotometer (Perkin-Elmer LS 55, Waltham, Massachusetts, USA) with an excitation wavelength of 325 nm. The steady-state surface photovoltage spectroscopy (SS-SPS, home-built, Harbin, Heilongjiang, China) measurements of the samples were obtained with a home-built apparatus equipped with a lock-in amplifier (SR 830) and synchronized with a light chopper (SR 540) at different atmospheres. The sample was sandwiched between two indium-tin-oxide (ITO) glass electrodes. A monochromatic light was obtained from 500 W Xe lamp (CHF XQ 500 W, Global Xe lamp power) through a double prism monochromator (SBP 300, Zolix, Beijing, China). Time-resolved photoluminescence (TR-PL) measurements were carried out on a single photon-counting spectrometer (EdinburghFLS 1000, Edinburg Instruments, Edinburgh, Scotland, UK) with a radiation pulse of 369 nm, using a 50 ps pulse lamp. The fluorescence was detected at a wavelength of 420 nm.

### 1.2. Photoelectrochemical and Electrochemical Measurements

Photoelectrochemical and electrochemical measurements were carried out using an IVIUM V13806 electrochemical workstation in a traditional three-electrode system (coun-

ter electrode: Pt; reference electrode: saturated calomel electrode (SCE); working electrode: as-prepared sample film) with a 500 W Xe lamp as the light source in a 0.5 M Na<sub>2</sub>SO<sub>4</sub> solution (pH = 7). Before each experiment, the solution was bubbled with high-purity nitrogen gas (99.999 %) for 20 minutes. Photocurrent response curves (I-t curves) of six cycle tests were obtained within 800 s under a 0.5 V bias. The photocurrent density tests were performed at different illumination wavelengths where the monochromatic illuminant was from a 500 W Xe lamp and a monochromator (CM 110). Electrochemical impedance spectroscopy (EIS) measurements were carried out with a 0.5 M Na<sub>2</sub>SO<sub>4</sub> solution as the electrolyte, using the same three-electrode configuration over a frequency range from 10<sup>2</sup> to 10<sup>5</sup> Hz, with amplitude of 10 mV (Root Mean Square) and a bias of 0.5 V.

The cyclic voltammetry (CV) measurements were conducted using an IVIUM V13806 electrochemical workstation, using another three-electrode system (counter electrode: Pt; reference electrode: Ag/AgCl; working electrode: as-prepared sample film). The electrolyte was a tetrabutylammonium perchlorate aqueous solution (0.1 M, pH = 6) with a scanning rate of 50 mV s<sup>-1</sup>.

The working electrode was prepared by the following method. A 100 mg sample was dissolved in 1.8 ml ethanol and 0.2 ml Nafion solution (5 wt%) and stirred for 5 days. Then the mixture was coated on the conductive surface of ITO glass and dried in a vacuum under 60 °C.

### 1.3. Evaluation of Produced •OH Amount

A 100 mg sample was dispersed in 50 ml coumarin solution (1 × 10<sup>-3</sup> M). Prior to irradiation, the solution was stirred in the dark for 30 min to achieve the adsorption-desorption equilibrium. The sample was then irradiated for 1 h under visible light ( $\lambda > 420$  nm) by a Xe lamp (150 W). After irradiation, the sample was centrifuged, and then the supernatant was tested using a spectrophotometer (Perkin-Elmer LS 55) to detect the fluorescence of 7-hydroxycoumarin with an emission peak at ~460 nm.

## 2. Scheme, Figures, Table, and Method

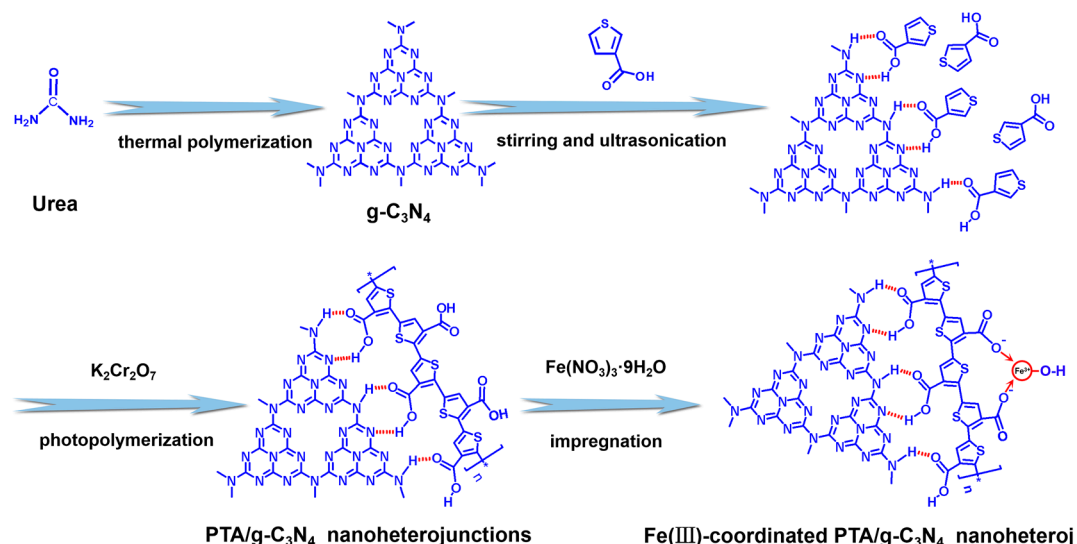

**Scheme S1.** Synthetic route of Fe(III)-coordinated PTA/g-C<sub>3</sub>N<sub>4</sub> nanoheterojunctions.

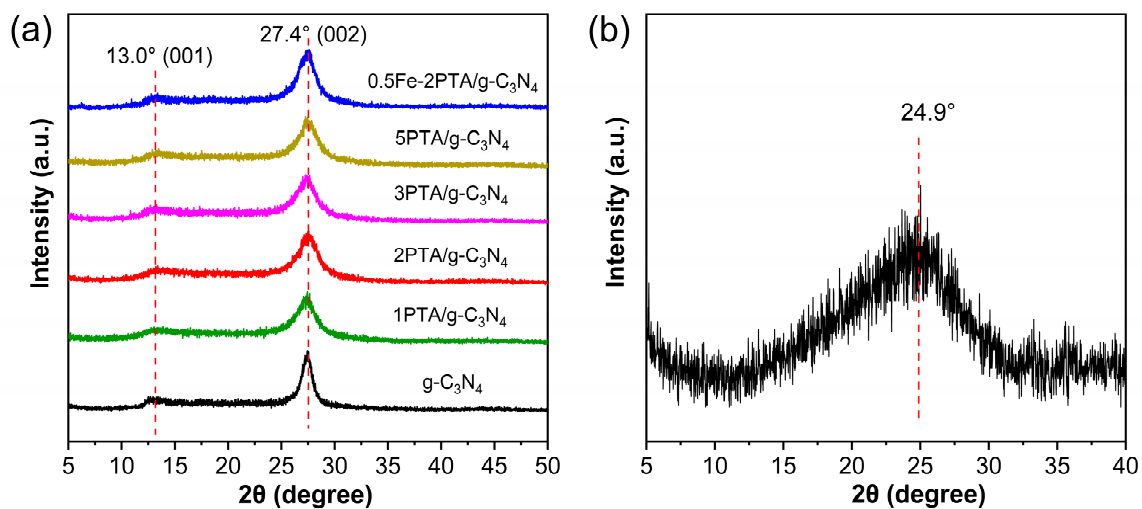

**Figure S1.** (a) XRD patterns of  $g\text{-C}_3\text{N}_4$ , xPTA/ $g\text{-C}_3\text{N}_4$  and 0.5Fe-2PTA/ $g\text{-C}_3\text{N}_4$ . (b) XRD pattern of PTA.

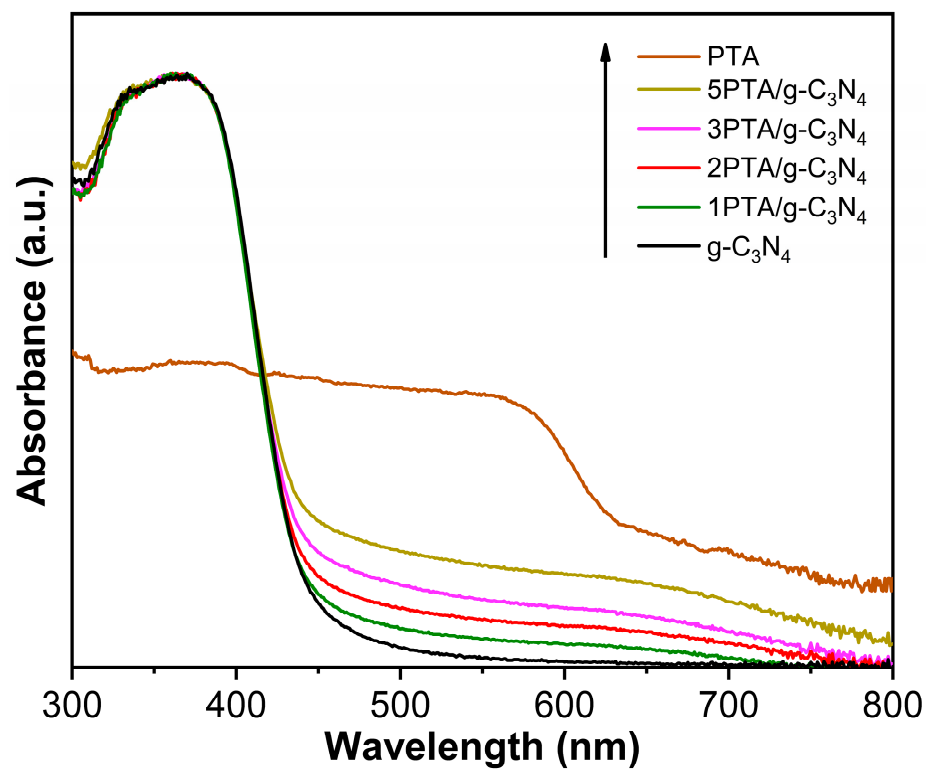

**Figure S2.** UV-Vis diffuse reflection spectra of PTA,  $g\text{-C}_3\text{N}_4$  and xPTA/ $g\text{-C}_3\text{N}_4$ .

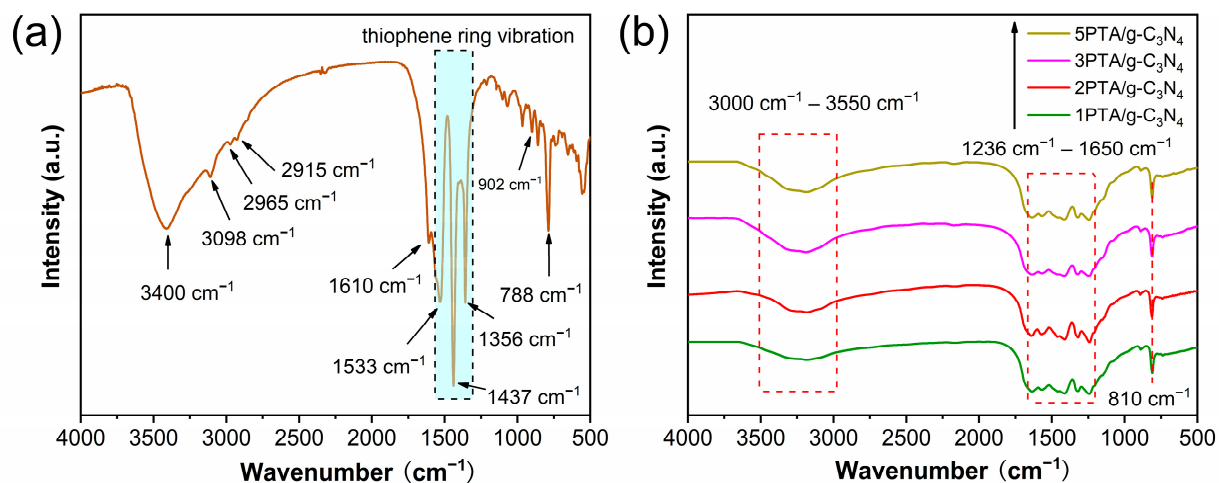

Figure S3. FT-IR spectra of PTA (a) and (b) xPTA/g-C<sub>3</sub>N<sub>4</sub>.

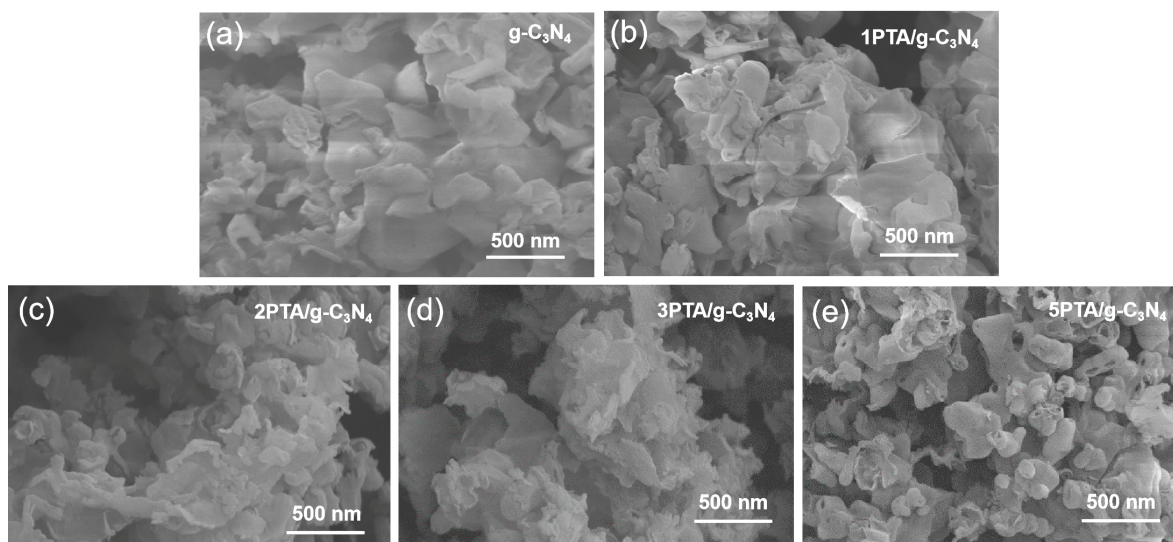

Figure S4. SEM images of g-C<sub>3</sub>N<sub>4</sub> (a) and xPTA/g-C<sub>3</sub>N<sub>4</sub> (b–e).

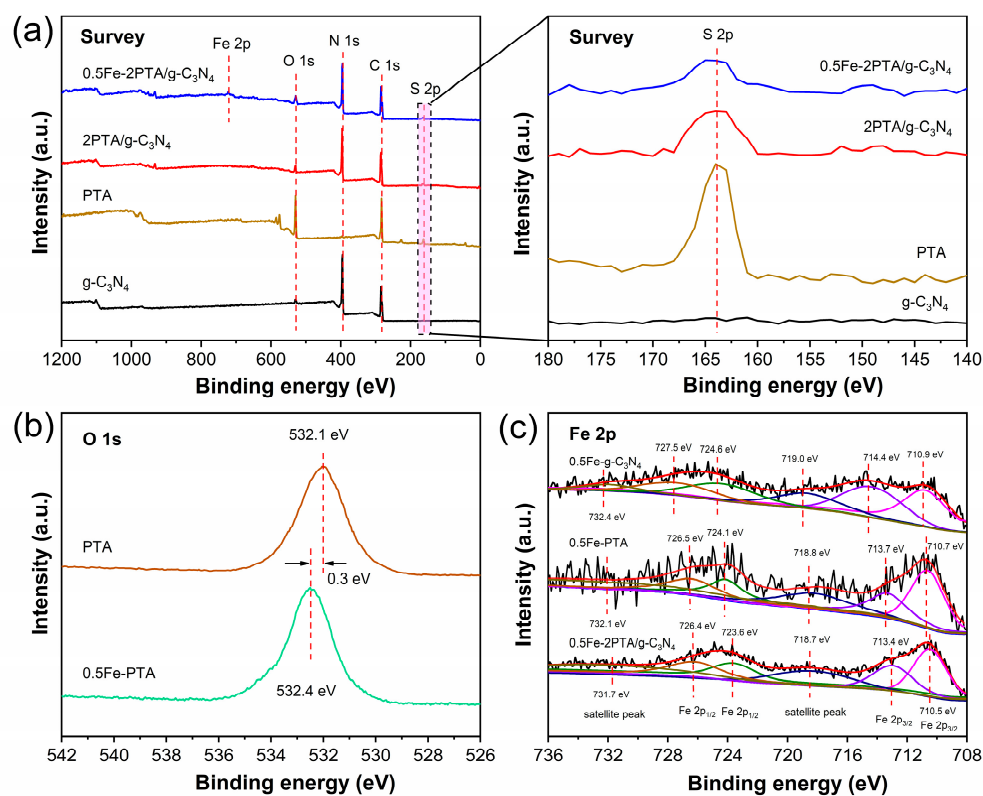

Figure S5. XPS spectra of samples: (a) survey and partially enlarged drawing, (b) O 1s and (c) Fe 2p.

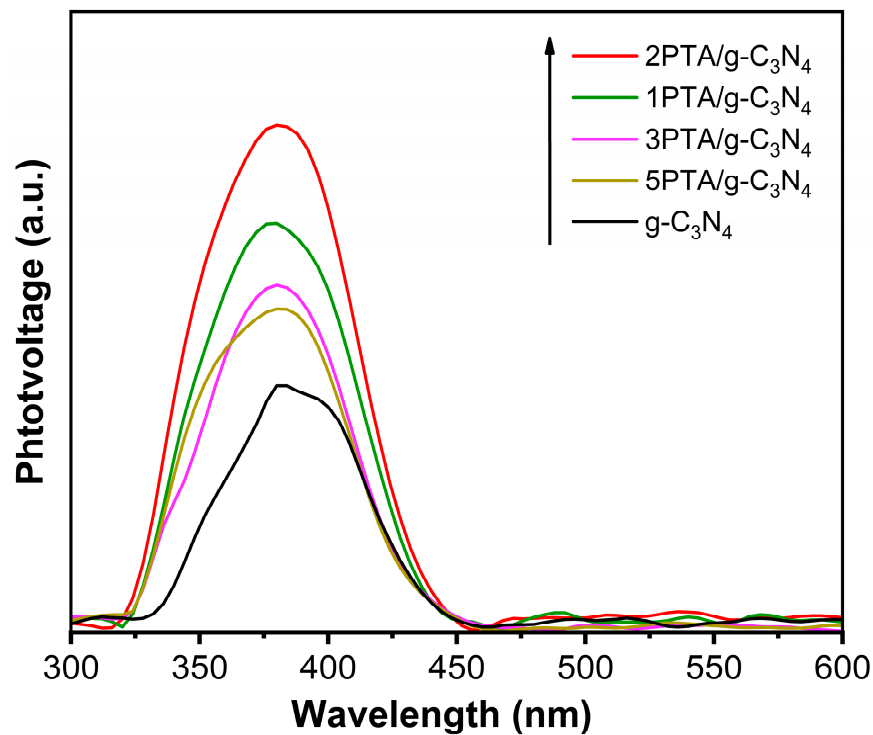

Figure S6. SS-SPS responses in air of g-C<sub>3</sub>N<sub>4</sub> and xPTA/g-C<sub>3</sub>N<sub>4</sub>.

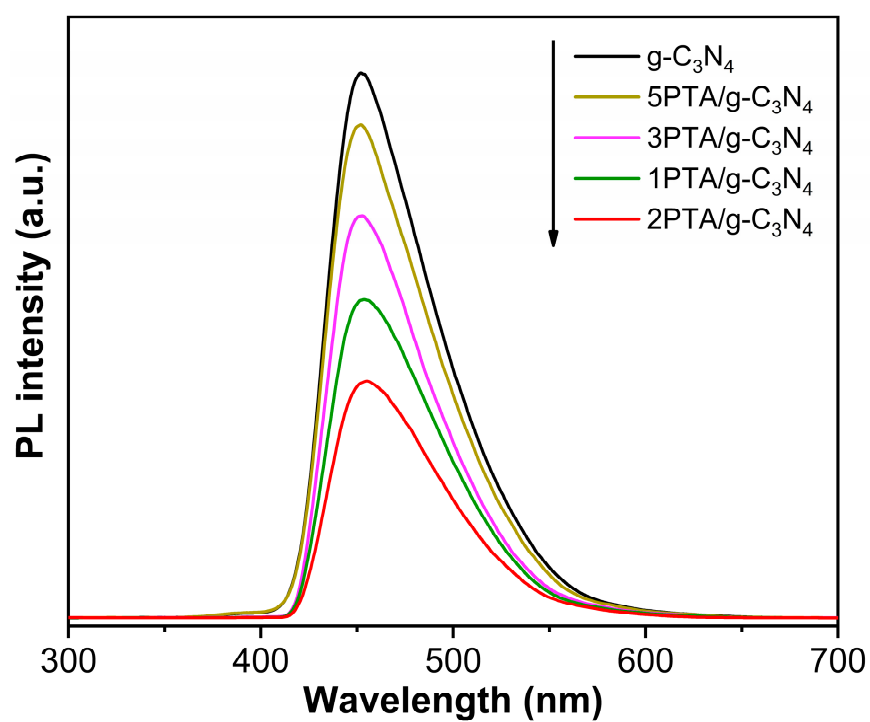

Figure S7. PL spectra of g-C<sub>3</sub>N<sub>4</sub> and xPTA/g-C<sub>3</sub>N<sub>4</sub>.

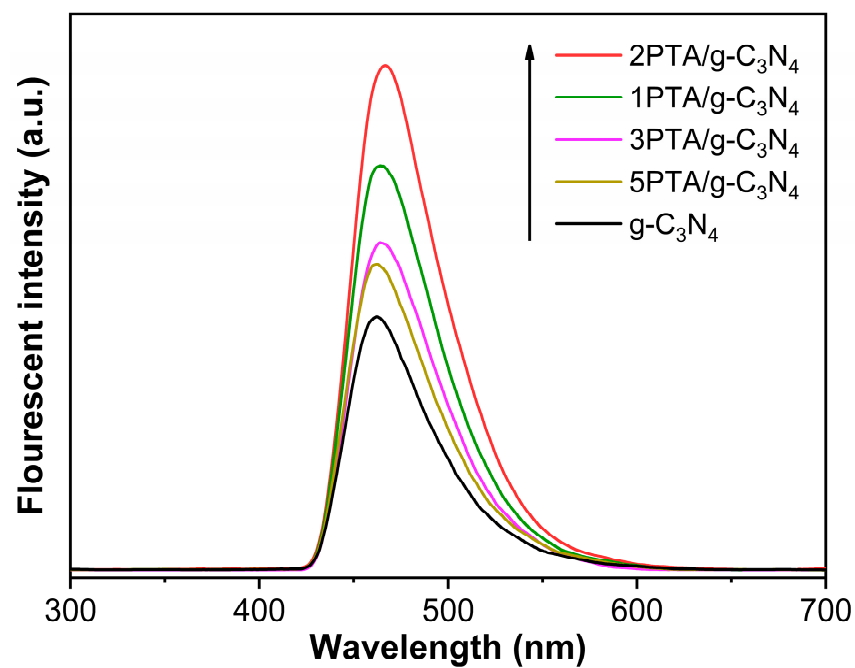

Figure S8. Fluorescence spectra related to the formed •OH amounts of g-C<sub>3</sub>N<sub>4</sub> and xPTA/g-C<sub>3</sub>N<sub>4</sub> after irradiation for 1 h under visible-light irradiation ( $\lambda > 420$  nm).

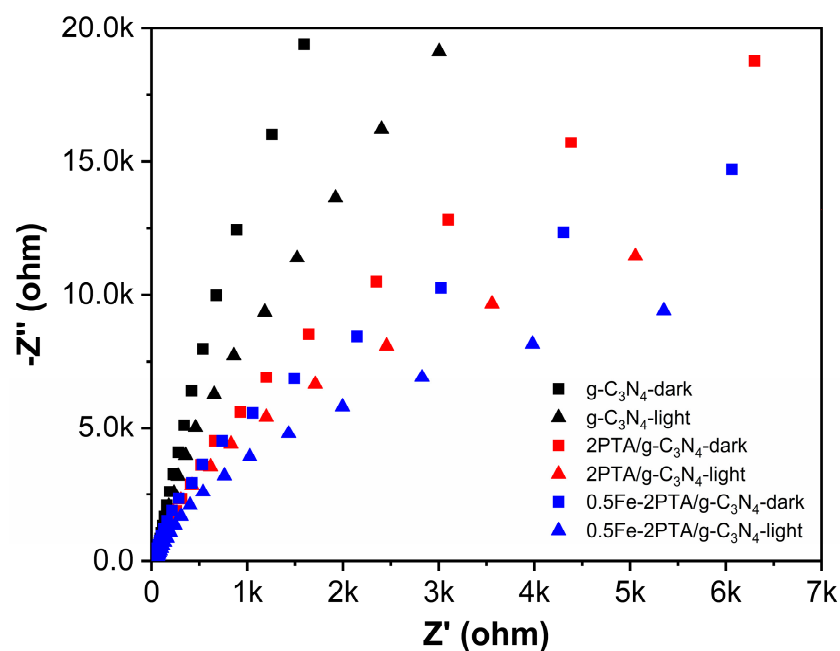

**Figure S9.** Nyquist plots under visible light illumination ( $\lambda > 420$  nm) of g-C<sub>3</sub>N<sub>4</sub>, 2PTA/g-C<sub>3</sub>N<sub>4</sub> and 0.5Fe-2PTA/g-C<sub>3</sub>N<sub>4</sub> (0.5 M Na<sub>2</sub>SO<sub>4</sub> aqueous solution, pH = 7, SCE).

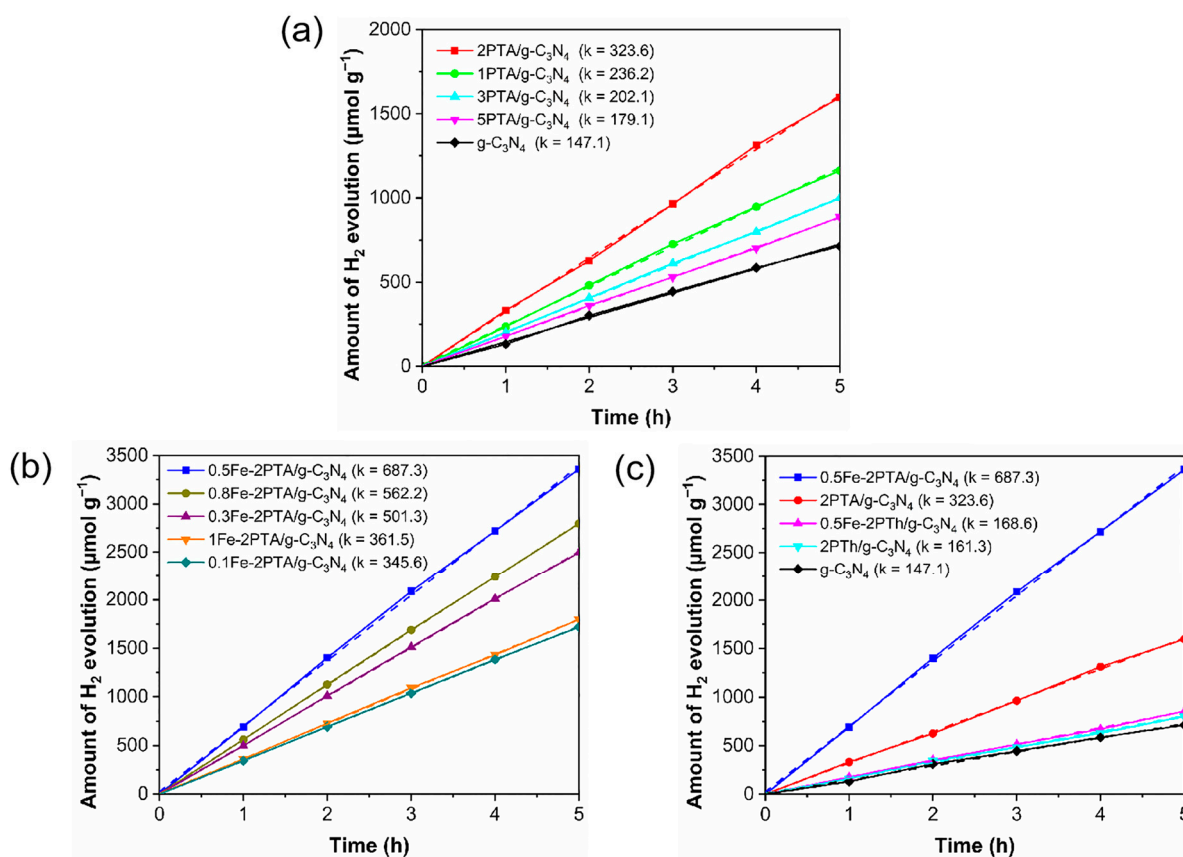

**Figure S10.** Photocatalytic activities of water reduction for H<sub>2</sub> evolution (1 wt% Pt-loaded, 10 vol% TEOA as sacrificial agent,  $\lambda > 420$  nm) of samples: (a) g-C<sub>3</sub>N<sub>4</sub> and xPTA/g-C<sub>3</sub>N<sub>4</sub>; (b) yFe-2PTA/g-C<sub>3</sub>N<sub>4</sub>; (c) comparison of g-C<sub>3</sub>N<sub>4</sub>, 2PTA/g-C<sub>3</sub>N<sub>4</sub>, 0.5Fe-2PTA/g-C<sub>3</sub>N<sub>4</sub>, 2PTh/g-C<sub>3</sub>N<sub>4</sub> and 0.5Fe-2PTh/g-C<sub>3</sub>N<sub>4</sub>.



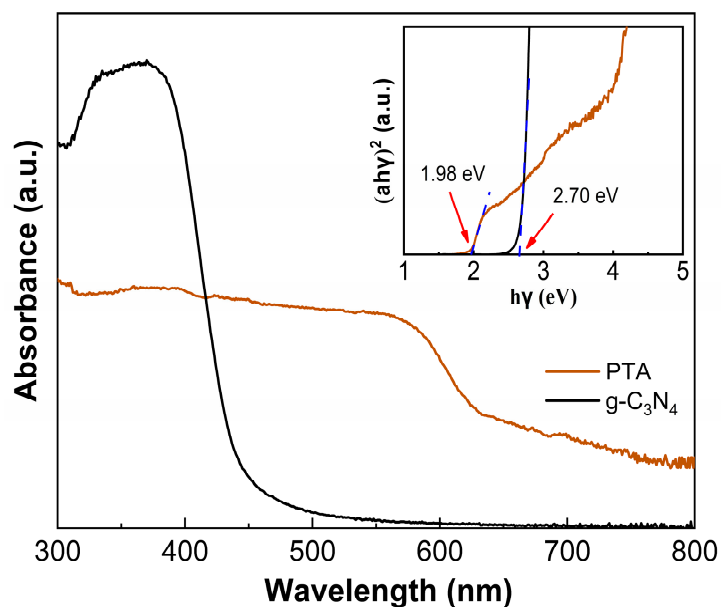

**Figure S11.** UV-Vis spectra of g-C<sub>3</sub>N<sub>4</sub> and PTA. Inset shows the Tauc plots of g-C<sub>3</sub>N<sub>4</sub> and PTA.

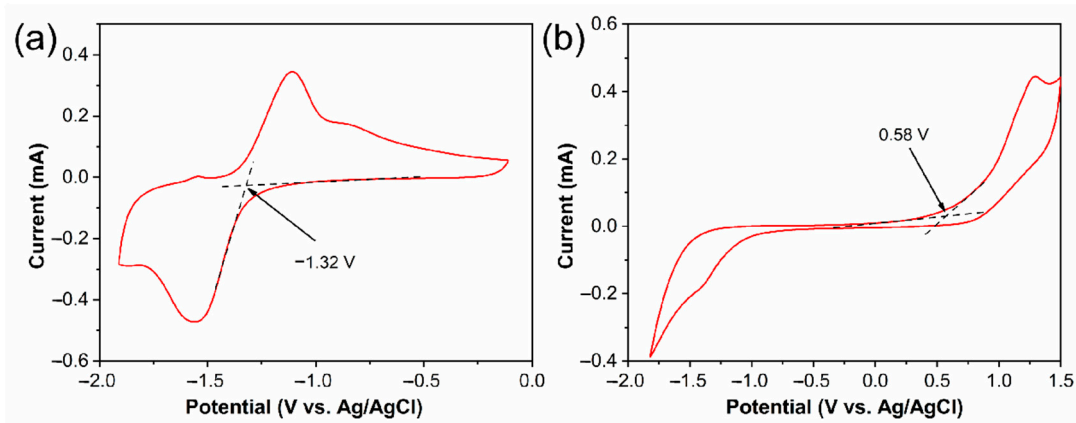

**Figure S12.** Cyclic voltammetry measurements of (a) g-C<sub>3</sub>N<sub>4</sub> and (b) PTA.

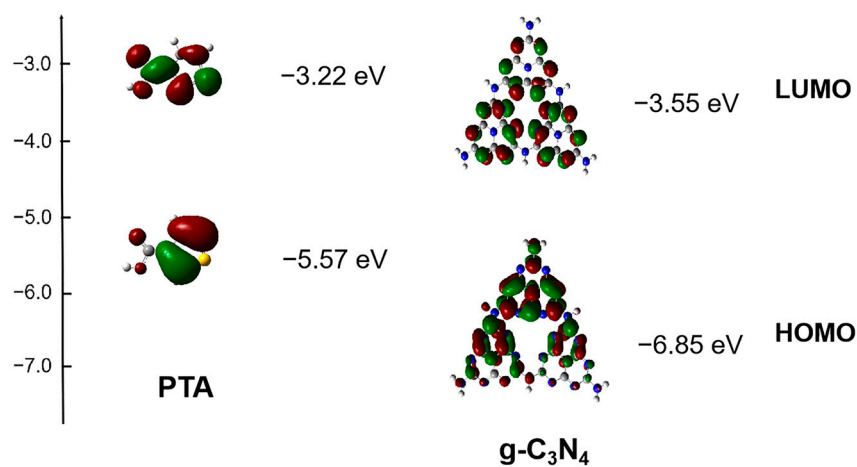

**Figure S13.** B3LYP/6-31G wave functions of the frontier molecular orbital in PTA and g-C<sub>3</sub>N<sub>4</sub> with a chain length of  $n = 1$ . The grey ball: carbon atom; blue ball: nitrogen atom; red ball: oxygen atom; yellow ball: sulfur atom; white ball: hydrogen atom.



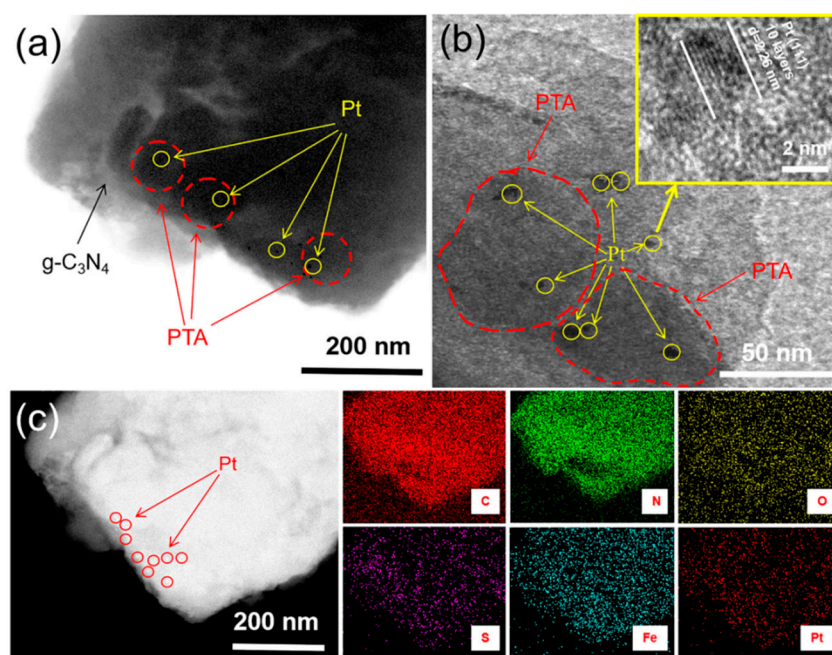

**Figure S14.** (a) TEM image of 0.5Fe-2PTA/g-C<sub>3</sub>N<sub>4</sub> (1 wt% Pt loaded). (b) HRTEM image of 0.5Fe-2PTA/g-C<sub>3</sub>N<sub>4</sub> (1 wt% Pt loaded). (c) HAADF-STEM image and corresponding EDS mapping of 0.5Fe-2PTA/g-C<sub>3</sub>N<sub>4</sub> (1 wt% Pt loaded).

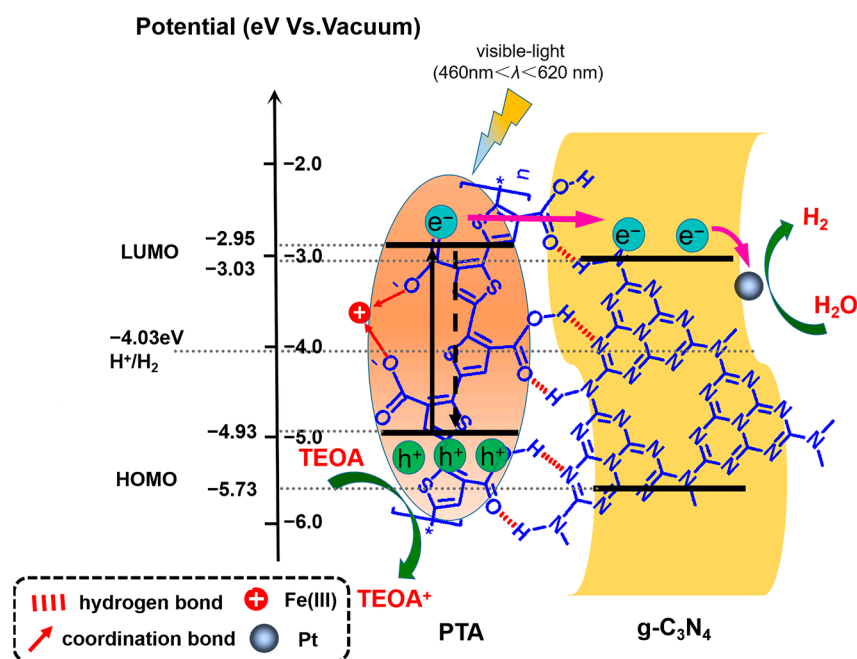

**Figure S15.** Mechanism of photogenerated charge separation and corresponding photochemical reactions in Fe(III)-coordinated PTA/g-C<sub>3</sub>N<sub>4</sub> nanoheterojunctions.

#### Method 1:

The HOMO and LUMO were acquired from the UV-Vis DRS spectra (Figure S11) and cyclic voltammetry curves (Figure S12), according to the following method [1,2]:

Ferrocene was used as an external reference for calibration ( $E_{1/2, \text{ferrocene}} = 0.45 \text{ V vs. Ag/AgCl}$ ).  $E_{1/2, \text{ferrocene}}$  represents the average potential of the redox couple peaks of ferrocene. The HOMO of PTA and the LUMO of g-C<sub>3</sub>N<sub>4</sub> are determined as follows:

$$E_{HOMO} \text{ (eV)} = - (E_{ox\_onset} \text{ vs. Ag/AgCl} + 4.80 - E_{1/2, \text{ferrocene}}) \quad (1)$$

$$E_{LUMO} \text{ (eV)} = - (E_{re\_onset} \text{ vs. Ag/AgCl} + 4.80 - E_{1/2, \text{ferrocene}}) \quad (2)$$

$E_{ox\_onset}$  and  $E_{re\_onset}$  represent the onset oxidation potential of PTA and the onset reduction potential of g-C<sub>3</sub>N<sub>4</sub> in the CV curves. The  $E_{ox\_onset}$  of PTA and  $E_{re\_onset}$  of g-C<sub>3</sub>N<sub>4</sub> are marked with black arrows in Figure S12.

The optical absorption band edge ( $E_g$ ) of PTA and g-C<sub>3</sub>N<sub>4</sub> can be acquired according to the UV–Vis DRS spectra, as shown in the inset of Table S1 [3].

**Table S1.** HOMO and LUMO positions determined from CV curves, UV–Vis DRS spectra and DFT calculation methods.

| Sample                          | CV                                 |                                    | DFT                           |                               |                               |                               | $E_g$<br>(eV) |
|---------------------------------|------------------------------------|------------------------------------|-------------------------------|-------------------------------|-------------------------------|-------------------------------|---------------|
|                                 | $E_{ox\_onset}$<br>(V vs. Ag/AgCl) | $E_{re\_onset}$<br>(V vs. Ag/AgCl) | $E_{HOMO}$<br>(eV vs. vacuum) | $E_{LUMO}$<br>(eV vs. vacuum) | $E_{HOMO}$<br>(eV vs. vacuum) | $E_{LUMO}$<br>(eV vs. vacuum) |               |
| g-C <sub>3</sub> N <sub>4</sub> | 1.38                               | −1.32                              | −5.73                         | −3.03                         | −6.85                         | −3.55                         | 2.70          |
| PTA                             | 0.58                               | −1.40                              | −4.93                         | −2.95                         | −5.57                         | −3.22                         | 1.98          |

## References

1. Zhou, W.; Jia, T.; Shi, H.; Yu, D.; Hong, W.; Chen, X. Conjugated polymer dots/graphitic carbon nitride nanosheet heterojunctions for metal-free hydrogen evolution photocatalysis. *J. Mater. Chem. A* **2019**, *7*, 303–311. <https://doi.org/10.1039/C8TA09735F>.
2. Jiang, L.; Yuan, X.; Zeng, G.; Wu, Z.; Liang, J.; Chen, X.; Leng, L.; Wang, H.; Wang, H. Metal-free efficient photocatalyst for stable visible-light photocatalytic degradation of refractory pollutant. *Appl. Catal. B: Environ.* **2018**, *221*, 715–725. <https://doi.org/10.1016/j.apcatb.2017.09.059>.
3. Li, Y.; Pang, X.; Zhao, Q.; Zhang, B.; Guo, X.; Zhang, Y.; Xie, Y.; Qin, C.; Jing, L. Controlled synthesis of nitro-terminated oligothiophene/crystallinity-improved g-C<sub>3</sub>N<sub>4</sub> heterojunctions for enhanced visible-light catalytic H<sub>2</sub> production. *ACS Appl. Mater. Interfaces* **2023**, *15*, 5365–5377. <https://doi.org/10.1021/acsami.2c21849>.
